# Supplementary material for: Machine learning magnetic resonance imaging radiomics predicts axillary lymph node metastasis in invasive breast cancer
Source: Research Square preprint supplement (doi:10.21203/rs.3.rs-104661/v1), 2020-11-21
Supplement: Supplementary file 1 [file ea9551482112f812b1e7f0c8.docx]

**Data Supplement Content**

**Supplementary Fig. 1** Patients recruitment and study design

**Supplementary Fig. 2** Performance of the tumor radiomic signature for predicting ALN metastasis

**Supplementary Fig. 3** Performance of the ALN radiomic signature for predicting ALN metastasis

**Supplementary Fig. 4** Performance of the clinical signature for predicting ALN metastasis

**Supplementary Fig. 5** Disease-free survival according to the multiomic radiomic signature-based score

**Supplementary Fig. 6** Gene ontology analysis of the radiomic-based genes

**Supplementary Table 1** The performance of single sequence signatures for axillary lymph node metastasis prediction

**Supplementary Table 2** Univariable analysis of axillary lymph node status in relation to clinicopathologic characteristics in the training cohort

**Supplementary Table 3** Subgroup analysis of the multiomic radiomic signature for axillary lymph node metastasis prediction

**Supplementary Table 4** Biological functions of the radiomic-based genes

**Supplementary Table 5** Magnetic resonance imaging scanning parameters for the patients

**Supplementary Fig. 1** Patients recruitment and study design


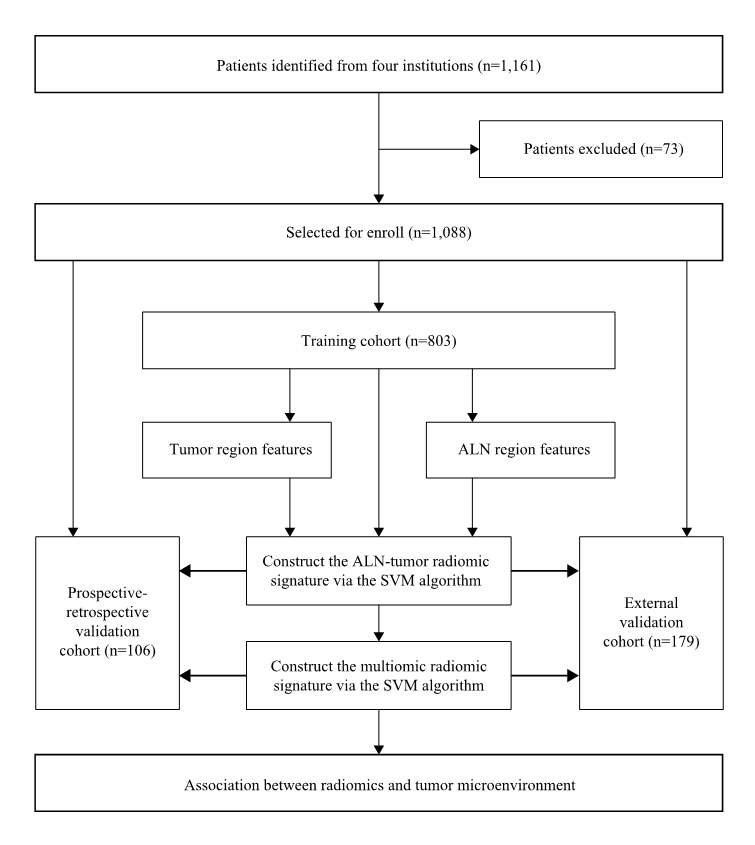


A total of 1,088 patients with preoperative magnetic resonance imaging were enrolled in this study to construct and validate signatures for predicting ALN metastasis. ALN, axillary lymph node; SVM, support vector machine.

**Supplementary Fig. 2** Performance of the tumor radiomic signature for predicting ALN metastasis


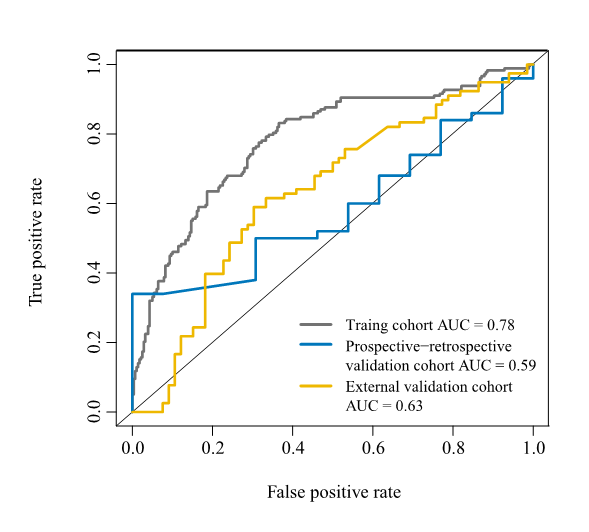


Performance of the tumor radiomic signature incorporating key radiomic features of tumor region from T1+C, T2WI, and DWI-ADC sequences for predicting ALN metastasis in the training, the prospective-retrospective validation, and the external validation cohorts, respectively. ALN, Axillary lymph node; AUC, area under the receiver operating characteristics curve; T1+C, contrast-enhanced T1-weighted imaging; T2WI, T2-weighted imaging; DWI-ADC, diffusion-weighted imaging.

**Supplementary Fig. 3** Performance of the ALN radiomic signature for predicting ALN metastasis


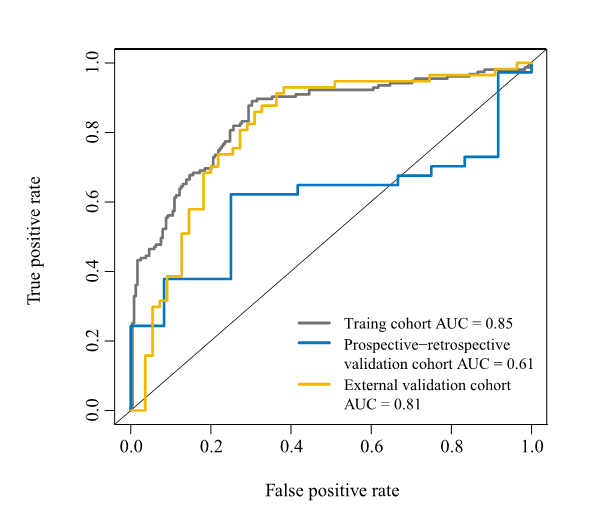


Performance of the ALN radiomic signature incorporating key radiomic features of ALN region from T1+C, T2WI, and DWI-ADC sequences for predicting ALN metastasis in the training, the prospective-retrospective validation, and the external validation cohorts, respectively. ALN, Axillary lymph node; AUC, area under the receiver operating characteristics curve; T1+C, contrast-enhanced T1-weighted imaging; T2WI, T2-weighted imaging; DWI-ADC, diffusion-weighted imaging.

**Supplementary Fig. 4** Performance of the clinical signature for predicting ALN metastasis


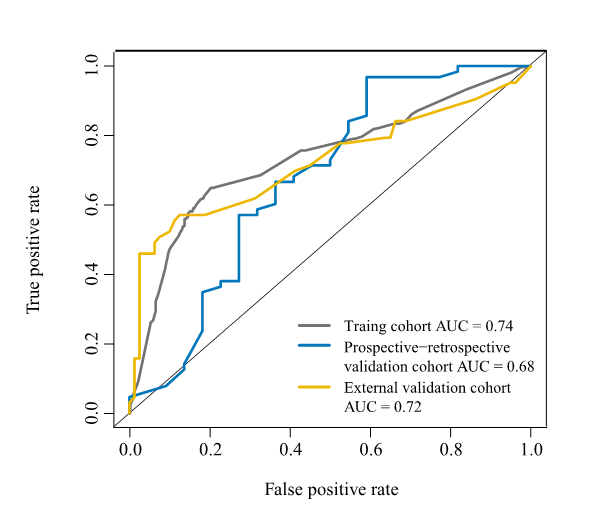


Performance of the clinical signature incorporating clinicopathological characteristics and molecular subtype for predicting ALN metastasis in the training, the prospective-retrospective validation, and the external validation cohorts, respectively. ALN, Axillary lymph node; AUC, area under the receiver operating characteristics curve.

**Supplementary Fig. 5** Disease-free survival according to the multiomic radiomic signature-based score


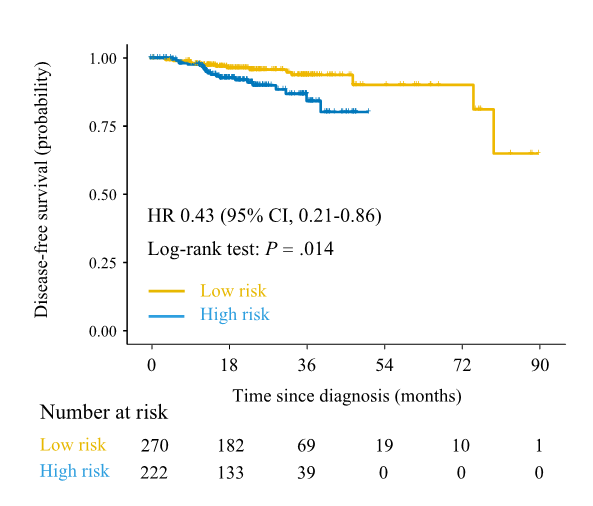


Kaplan-Meier curves of disease-free survival according to the multiomic radiomic signature-based score in 492 patients from both the training and the validation cohorts. A cutoff value of 0.334 was used to classify patients into high- and low-score groups. *P* values were calculated using the unadjusted log-rank test and hazard ratios were calculated by a univariate Cox regression analysis. ALN, axillary lymph node; HR, hazard ratio; CI, confidence interval.

**Supplementary Fig. 6** Gene ontology analysis of the radiomic-based genes


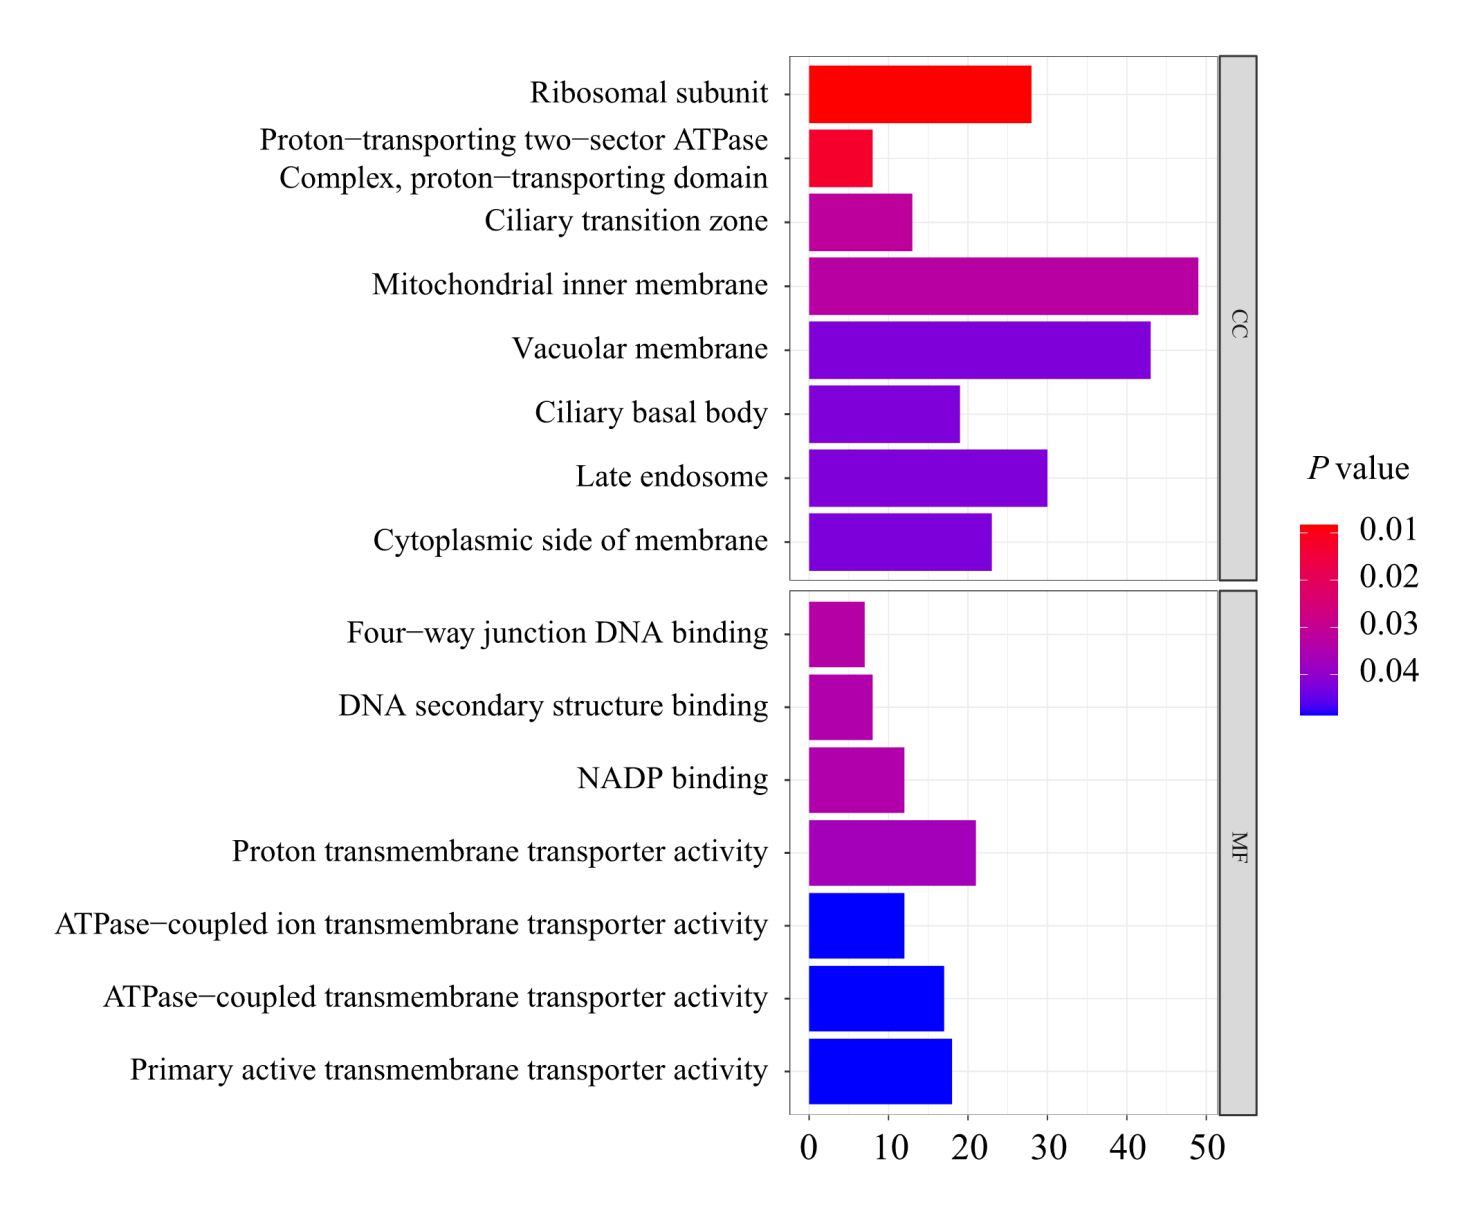


CC, Cellular Component; MF, Molecular Function.

| **Supplementary Table 1** The performance of single sequence signatures for axillary lymph node metastasis prediction | | | | | | | | | | | |
| --- | --- | --- | --- | --- | --- | --- | --- | --- | --- | --- | --- |
| Signature | Signature Performance |  | ALN radiomics | | | |  | | Tumor radiomics | | |
|  |
|  | Training Cohort | Prospective-retrospective validation Cohort | External validation Cohort |  | | Training Cohort | | Prospective-retrospective validation Cohort | External validation Cohort |
| T1+C sequence  radiomic signature | No. of patients (n) |  | 783 | 101 | 146 |  | | 785 | | 96 | 152 |
|  | AUC |  | 0.78 | 0.59 | 0.76 |  | | 0.74 | | 0.54 | 0.63 |
| T2WI sequence  radiomic signature | n |  | 494 | 93 | 143 |  | | 717 | | 96 | 176 |
|  | AUC |  | 0.79 | 0.55 | 0.65 |  | | 0.70 | | 0.54 | 0.57 |
| DWI-ADC sequence  radiomic signature | n |  | 443 | 54 | 117 |  | | 474 | | 72 | 148 |
|  | AUC |  | 0.81 | 0.72 | 0.70 |  | | 0.72 | | 0.57 | 0.61 |
| Abbreviations: ALN, axillary lymph node; AUC, area under the receiver operating characteristics curve; T1+C, contrast-enhanced T1-weighted imaging; T2WI, T2-weighted imaging; DWI-ADC, diffusion-weighted imaging quantitatively measured apparent diffusion coefficients. | | | | | | | | | | | |

| **Supplementary Table 2** Univariable analysis of axillary lymph node status in relation to clinicopathologic characteristics in the training cohort | | | | |
| --- | --- | --- | --- | --- |
|  | Axillary lymph node status | | | |
| Characteristic | No. (%) Negative | No. (%) Positive | *P* value | |
| Age, years |  |  | 0.012 | |
| <40 | 65 (13.7) | 67 (20.4) |  | |
| ≥40 | 410 (86.3) | 261 (79.6) |  | |
| Number of tumors |  |  | 0.447 | |
| 1 | 421 (88.6) | 284 (86.9) |  | |
| >1 | 54 (11.4) | 43 (13.1) |  | |
| Clinical T stage |  |  | < 0.001 | |
| T1 | 241 (50.7) | 97 (29.6) |  | |
| T2 | 213 (44.8) | 209 (63.7) |  | |
| T3 | 16 (3.4) | 15 (4.6) |  | |
| T4 | 5 (1.1) | 7 (2.1) |  | |
| Clinical N stage |  |  | < 0.001 | |
| N0 | 382 (80.4) | 132 (40.2) |  | |
| N1 | 90 (18.9) | 178 (54.3) |  | |
| N2 | 2 (0.4) | 18 (5.5) |  | |
| N3 | 1 (0.2) | 0 (0.0) |  | |
| Clinical TNM stage |  |  | < 0.001 | |
| I | 207 (43.6) | 51 (15.5) |  | |
| II | 253 (53.3) | 241 (73.5) |  | |
| III | 15 (3.2) | 36 (11.0) |  | |
| ER status |  |  | 0.438 | |
| Negative | 64 (13.6) | 51 (15.5) |  | |
| Positive | 407 (86.4) | 277 (84.5) |  | |
| PR status |  |  | 0.860 | |
| Negative | 128 (27.2) | 91 (27.7) |  | |
| Positive | 343 (72.8) | 237 (72.3) |  | |
| Her2 status |  |  | 0.052 | |
| Negative | 326 (72.0) | 208 (65.4) |  | |
| Positive | 127 (28.0) | 110 (34.6) |  | |
| Ki67 expression |  |  | 0.010 | |
| < 30 | 259 (55.0) | 150 (45.7) |  | |
| ≧30 | 212 (45.0) | 178 (54.3) |  | |
| Molecular subtypes |  |  | 0.033 | |
| Luminal A | 92 (20.0) | 30 (9.2) |  | |
| Luminal B | 306 (66.7) | 249 (76.6) |  | |
| HER2-positive | 31 (6.8) | 28 (8.6) |  | |
| Triple negative | 30 (6.5) | 18 (5.5) |  | |
| Abbreviations: TNM, tumor–node–metastasis; ER, estrogen receptor; PR, progesterone receptor; Her2, human epidermal growth factor receptor 2; Ki67 expression, proliferation marker protein Ki-67. | | | |

| **Supplementary Table 3** Subgroup analysis of the multiomic radiomic signature for axillary lymph node metastasis prediction | | | | |
| --- | --- | --- | --- | --- |
| Characteristic |  | Training cohort | Prospective-retrospective validation cohort | External validation cohort |
|  | (AUC) | (AUC) | (AUC) |
| Age |  |  |  |  |
| <40 |  | 0.92 | 0.95 | 0.89 |
| ≧40 |  | 0.89 | 0.94 | 0.92 |
| Ki67 |  |  |  |  |
| <30 |  | 0.90 | 0.86 | 0.88 |
| ≧30 |  | 0.90 | 0.96 | 0.94 |
| Clinical T stage |  |  |  |  |
| T1 |  | 0.86 | / | 1.00 |
| T2 |  | 0.92 | 0.88 | 0.80 |
| T3-T4 |  | 0.87 | 1.00 | 1.00 |
| Clinical N stage |  |  |  |  |
| N0 |  | 0.84 | 1.00 | 0.97 |
| N1 |  | 0.89 | 0.91 | / |
| N2-3 |  | 0.94 | / | / |
| Numbers of positive ALN |  |  |  |  |
| 1 |  | 0.88 | 0.79 | 0.97 |
| 2 |  | 0.89 | 1.00 | 0.93 |
| 3 |  | 0.92 | 0.93 | 0.87 |
| Molecular subtype |  |  |  |  |
| Luminal A |  | 0.91 | 0.80 | 0.91 |
| Luminal B |  | 0.89 | 0.93 | 0.92 |
| HER2-positive |  | 0.90 | / | 0.76 |
| Triple negative |  | 1.00 | / | 1.00 |
| Abbreviations: ALN, axillary lymph node; AUC, area under the receiver operating characteristics curve; HER2, human epidermal growth factor receptor 2; Ki67, proliferation marker protein Ki-67. | | | | |

| **Supplementary Table 4** Biological functions of the radiomic-based genes | | | |
| --- | --- | --- | --- |
| ID | Description | *P* value | Count |
| GO:0044391 | ribosomal subunit | 0.00830 | 28 |
| GO:0033177 | proton-transporting two-sector ATPase complex, proton-transporting domain | 0.01273 | 8 |
| GO:0035869 | ciliary transition zone | 0.03172 | 13 |
| GO:0005743 | mitochondrial inner membrane | 0.03295 | 49 |
| GO:0005774 | vacuolar membrane | 0.04229 | 43 |
| GO:0036064 | ciliary basal body | 0.04229 | 19 |
| GO:0005770 | late endosome | 0.04229 | 30 |
| GO:0098562 | cytoplasmic side of membrane | 0.04249 | 23 |
| GO:0005840 | ribosome | 0.04301 | 31 |
| GO:0099568 | cytoplasmic region | 0.04588 | 29 |
| GO:0000400 | four-way junction DNA binding | 0.03342 | 7 |
| GO:0000217 | DNA secondary structure binding | 0.03441 | 8 |
| GO:0050661 | NADP binding | 0.03441 | 12 |
| GO:0015078 | proton transmembrane transporter activity | 0.03690 | 21 |
| GO:0042625 | ATPase-coupled ion transmembrane transporter activity | 0.04862 | 12 |
| GO:0042626 | ATPase-coupled transmembrane transporter activity | 0.04862 | 17 |
| GO:0015399 | primary active transmembrane transporter activity | 0.04862 | 18 |
| KEGG:hsa00190 | Oxidative phosphorylation | 0.04323 | 21 |
| Abbreviations: GO, Gene Ontology; KEGG, Kyoto Encyclopedia of Genes and Genomes. | | | |

**Supplementary Table 5** Magnetic resonance imaging scanning parameters for the patients

| Hospital | Scanner | Sequence | TR/TE  (ms) | FOV  (mm) | Matrix | Slice Thickness (mm) | Slice Gap  (mm) | Slices | Flip Angle | Acquisition  Time (min) | Scans |
| --- | --- | --- | --- | --- | --- | --- | --- | --- | --- | --- | --- |
| SYSMH | Philips 1.5T  (Achieva) | T2WI | 4000/60 | 337×240 | 400×318 | 3 | 0 | 55 | 90° | 4min |  |
| DWI-ADC | 7439/53 | 363×340 | 360×301 | 3 | 0 | 55 | 90° | 4min35s |  |
| T1+C | 3.3/1.54 | 320×250 | 217×172 | 1 | 0 | 55 | 10° | 7min | 55 |
| Philips 3.0T  (Ingenia) | T2WI | 4000/60 | 337×240 | 400×318 | 3 | 0 | 55 | 90° | 4min |  |
| DWI-ADC | 7439/53 | 363×340 | 360×301 | 3 | 0 | 55 | 90° | 4min35s |  |
| T1+C | 3.3/1.54 | 320×250 | 217×172 | 1 | 0 | 55 | 10° | 7min | 55 |
| Siemens 1.5T  (Avanto) | T2WI | 2760/107 | 350×350 | 320×224 | 5 | 1 | 30 | 150° | 2min46s |  |
| DWI-ADC | 5400/119 | 400×252 | 200×170 | 6 | 1.8 | 20 | 180° | 2min34s |  |
| T1+C | 4.95/2.2 | 380×269 | 288×216 | 3 | 0.6 | 48-72 | 10° | 5-7min | 50/70 |
| Siemens 3.0T  (Skyra) | T2WI | 7600/75 | 340×340 | 448×358 | 4 | 0.8 | 35 | 116° | 3min42s |  |
| DWI-ADC | 7620/64 | 360×310 | 192×192 | 4 | 0.8 | 35 | 180° | 1min54s |  |
| T1+C | 3.25/1.22 | 380×327 | 256×218 | 2.5 | 0.5 | 48-72 | 10° | 5-7min | 50/70 |
| SYSUCC | United Imaging 3.0T  (China) | T2WI | 3600/74.34 | 340×340 | 336×335 | 5 | 1 | 24 | 90° | 3min05s |  |
| DWI-ADC | 3597/67.2 | 350×350 | 350×190 | 6 | 1 | 24 | 90° | 1min33s |  |
| T1+C | 4.3/1.99 | 340×340 | 336×335 | 0.67 | 0 | 204 | 10° | 9min58s | 8 |
| GE 3.0T  (USA) | T2WI | 3912/107.64 | 380×380 | 416×256 | 5 | 1 | 28 | 111° | 1min59s |  |
| DWI-ADC | 4168/60.2 | 380×380 | 128×160 | 5 | 1 | 48 | - | 1min40s |  |
| T1+C | 4.3/1.7 | 360×360 | 256×320 | 1 | 0 | 204 | 5° | 9min50s | 8 |

| Hospital | Scanner | Sequence | TR/TE  (ms) | FOV  (mm) | Matrix | Slice Thickness (mm) | Slice Gap  (mm) | Slices | Flip Angle | Acquisition  Time (min) | Scans |
| --- | --- | --- | --- | --- | --- | --- | --- | --- | --- | --- | --- |
| SYSUTH | Philips 1.5T  (Achieva) | T2WI | 3400/90 | 260×320 | 348×299 | 3 | 0.3 | 44 | 120° | 4min4s |  |
| DWI-ADC | 2000/103 | 320×320 | 160×160 | 5 | 1 | 32 | 90° | 1min36s |  |
| T1+C | 5.4/2.4 | 300×320 | 300×320 | 1 | 0 | 300 | 15° | 7min2s | 6 |
| Philips 3.0T  (Ingenia) | T2WI | 4495/70 | 280×340 | 332×377 | 3 | 0 | 52 | 90° | 3min53s |  |
| DWI-ADC | 7011/67 | 320×340 | 148×153 | 4 | 1 | 30 | 90° | 1min24s |  |
| T1+C | 4.8/2.1 | 280×340 | 280×339 | 1 | 0 | 300 | 12° | 6min59s | 6 |
| SMUSH | Philips 1.5T  (Achieva) | T2WI | 4518/70 | 320×260 | 256×159 | 4 | 0.07 | 36 | 120° | 3min19s |  |
| DWI-ADC | 5837/67 | 365×221 | 124×73 | 3 | 1 | 36 | 90° | 3min59s |  |
| T1+C | 6.0/2.9 | 350×255 | 252×243 | 2 | 1 | 150 | 10° | 6min42s | 9 |
| Siemens 3.0T  (Skyra) | T2WI | 4290/78 | 128×332 | 332×128 | 4 | 1 | 30 | 180° | 1min22s |  |
| DWI-ADC | 6560/49 | 340×172 | 66×130 | 4 | 0.8 | 37 | 180° | 3min51s |  |
| T1+C | 5.59/1.96 | 154×338 | 562×256 | 2 | 0.4 | 72 | 10° | 7min15s | 6 |

Abbreviations: FOV, field of view; TR, repetition time; TE, echo time; T1+C, contrast-enhanced T1-weighted imaging; T2WI, T2-weighted imaging; DWI-ADC, diffusion-weighted imaging quantitatively measured apparent diffusion coefficients; SYSMH, Sun Yat-sen Memorial Hospital of Sun Yat-sen University; SYSUCC, Sun Yat-sen University Cancer center; SYSUTH, Tungwah Hospital of Sun Yat-sen University; SMUSH, Shunde Hospital of Southen Medical University.
